# Supplementary figures and images for: Supervised Analysis for Phenotype Identification: The Case of Heart Failure Ejection Fraction Class
Source: Preprints.org preprint supplement (doi:10.20944/preprints202105.0677.v1), 2021-05-27

**Supplementary  
Figure 1**

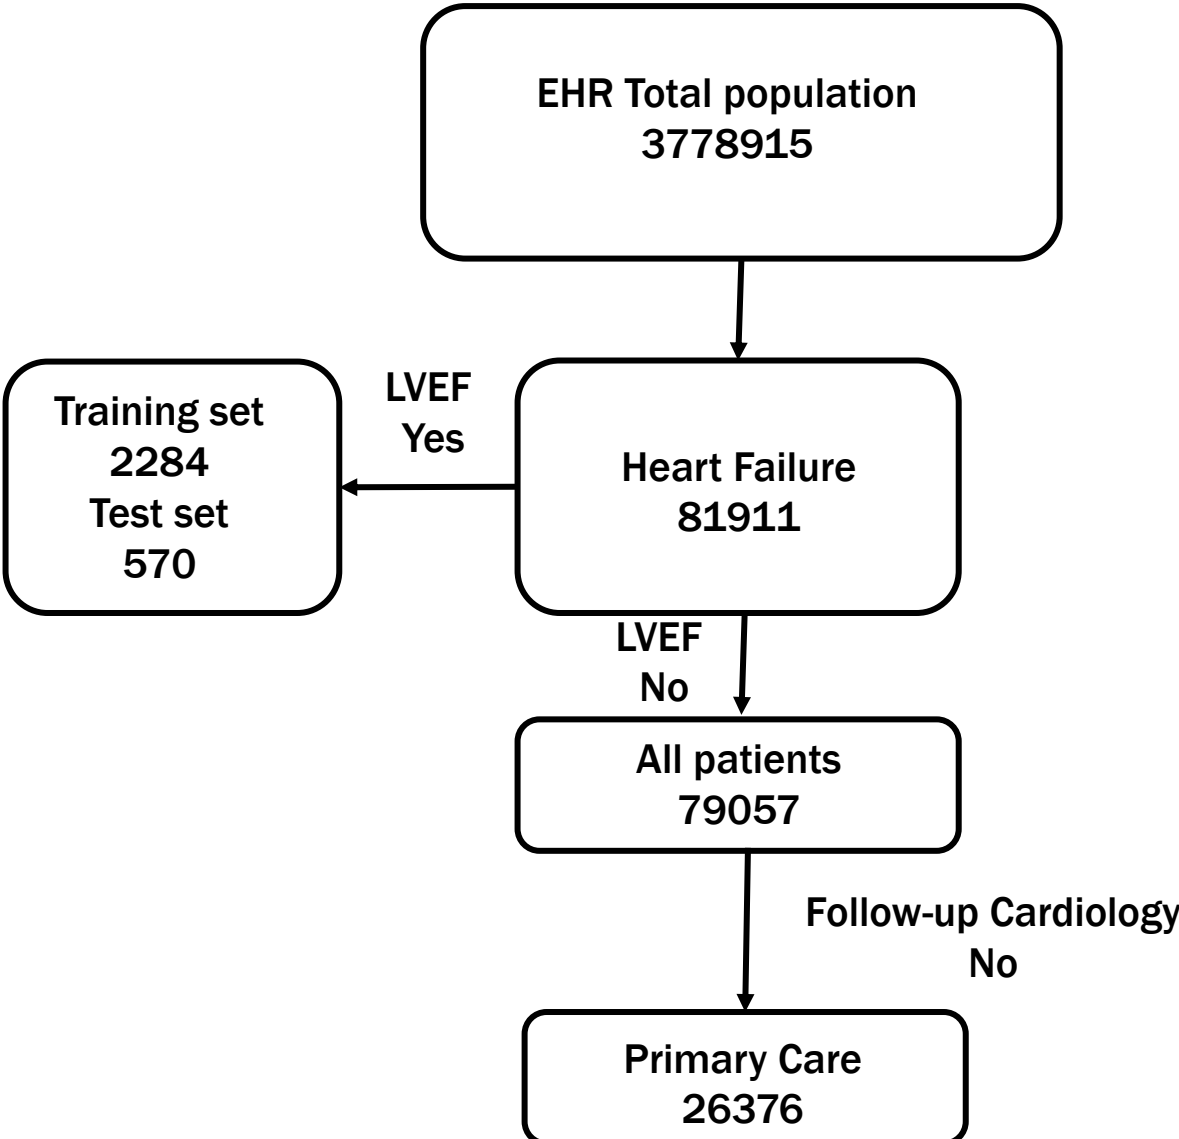

Supplement: Supplementary file 1 [file supplementary]
